# Supplementary material for: Nanotube topography rejuvenates the senescence of mesenchymal stem cells by activating YAP signalling
Source: Royal Society of Chemistry journal article supplement (doi:10.1039/d3tb02828c), 2024-01-01
Supplement: d3tb02828c1.pdf [file d3tb02828c1.pdf]

## Electronic Supplementary Information (ESI)

# Nanotube Topography Rejuvenates the Senescence of Mesenchymal Stem Cells by Activating YAP Signalling

Yanping Sun,<sup>a</sup> Yejia Yu,<sup>a</sup> Shixing Ma,<sup>a</sup> Chengcheng Liao,<sup>a</sup> Jian Yang,<sup>a</sup> Yun Lyu,<sup>a</sup> Xuanhao Zhang,<sup>a</sup> Jingyi Zhang,<sup>b</sup> Weidong Tian<sup>a \*</sup> and Li Liao<sup>a \*</sup>

---

*a. State Key Laboratory of Oral Diseases & National Clinical Research Center for Oral Diseases & Department of Pediatrics & Engineering Research Center of Oral Translational Medicine, Ministry of Education, West China Hospital of Stomatology, Sichuan University, 610041, Chengdu, China.*

*b. Chengdu Shiliankangjian Biotechnology Co., Ltd.*

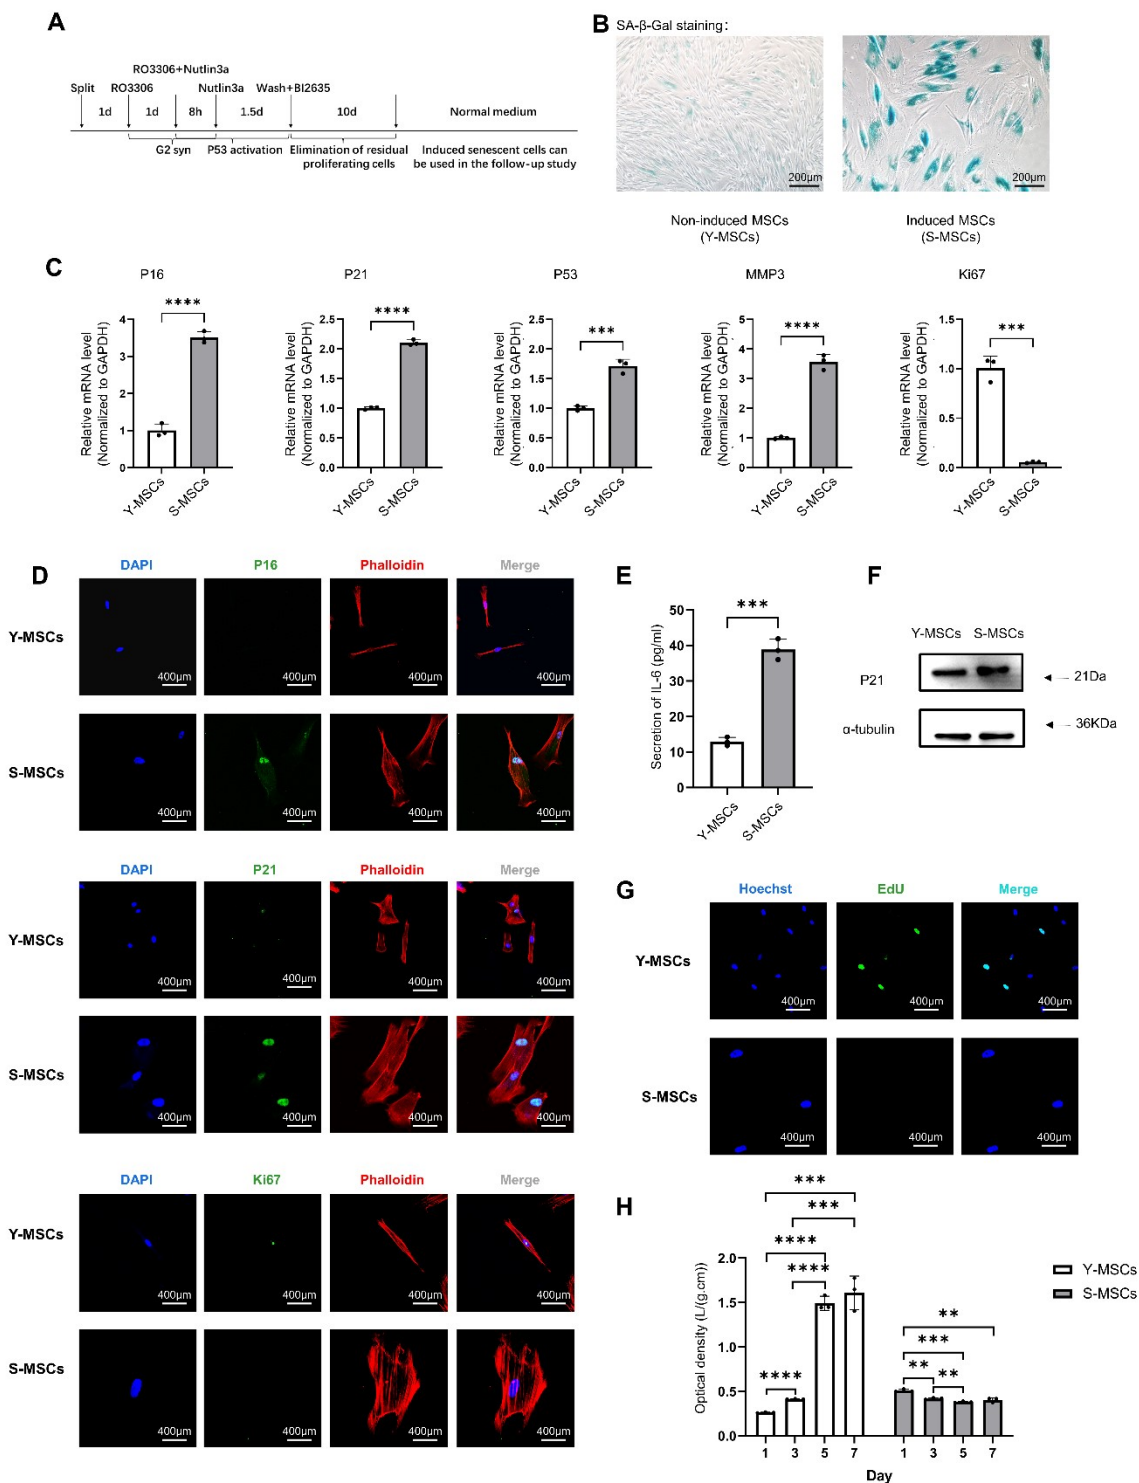

Figure S1. Induction and Characterization of Senescent Mesenchymal Stem Cells. (A) Schematic presentation illustrating the culture conditions for preparing S-MSCs. (B) SA- $\beta$ -gal staining comparing Y-MSCs and S-MSCs. (C) qRT-PCR analysis of senescence-related genes (P16, P21, P53, MMP3, and Ki67) in Y-MSCs and S-MSCs. (D) Immunofluorescence staining of P16, P21, and Ki67 in Y-MSCs and S-MSCs. (E) ELISA analysis of IL-6 levels in Y-MSCs and S-MSCs cultures for 2 days. (F) Western blot analysis of p21 in Y-MSCs and S-MSCs. (G) EdU staining of Y-MSCs and S-MSCs. (H) Absorbance values of Y-MSCs and S-MSCs cultured for 1, 3, 5, and 7 days detected using the CCK-8 assay. (\* $p < 0.05$ , \*\* $p < 0.01$ , \*\*\* $p < 0.001$ , \*\*\*\* $p < 0.0001$ )

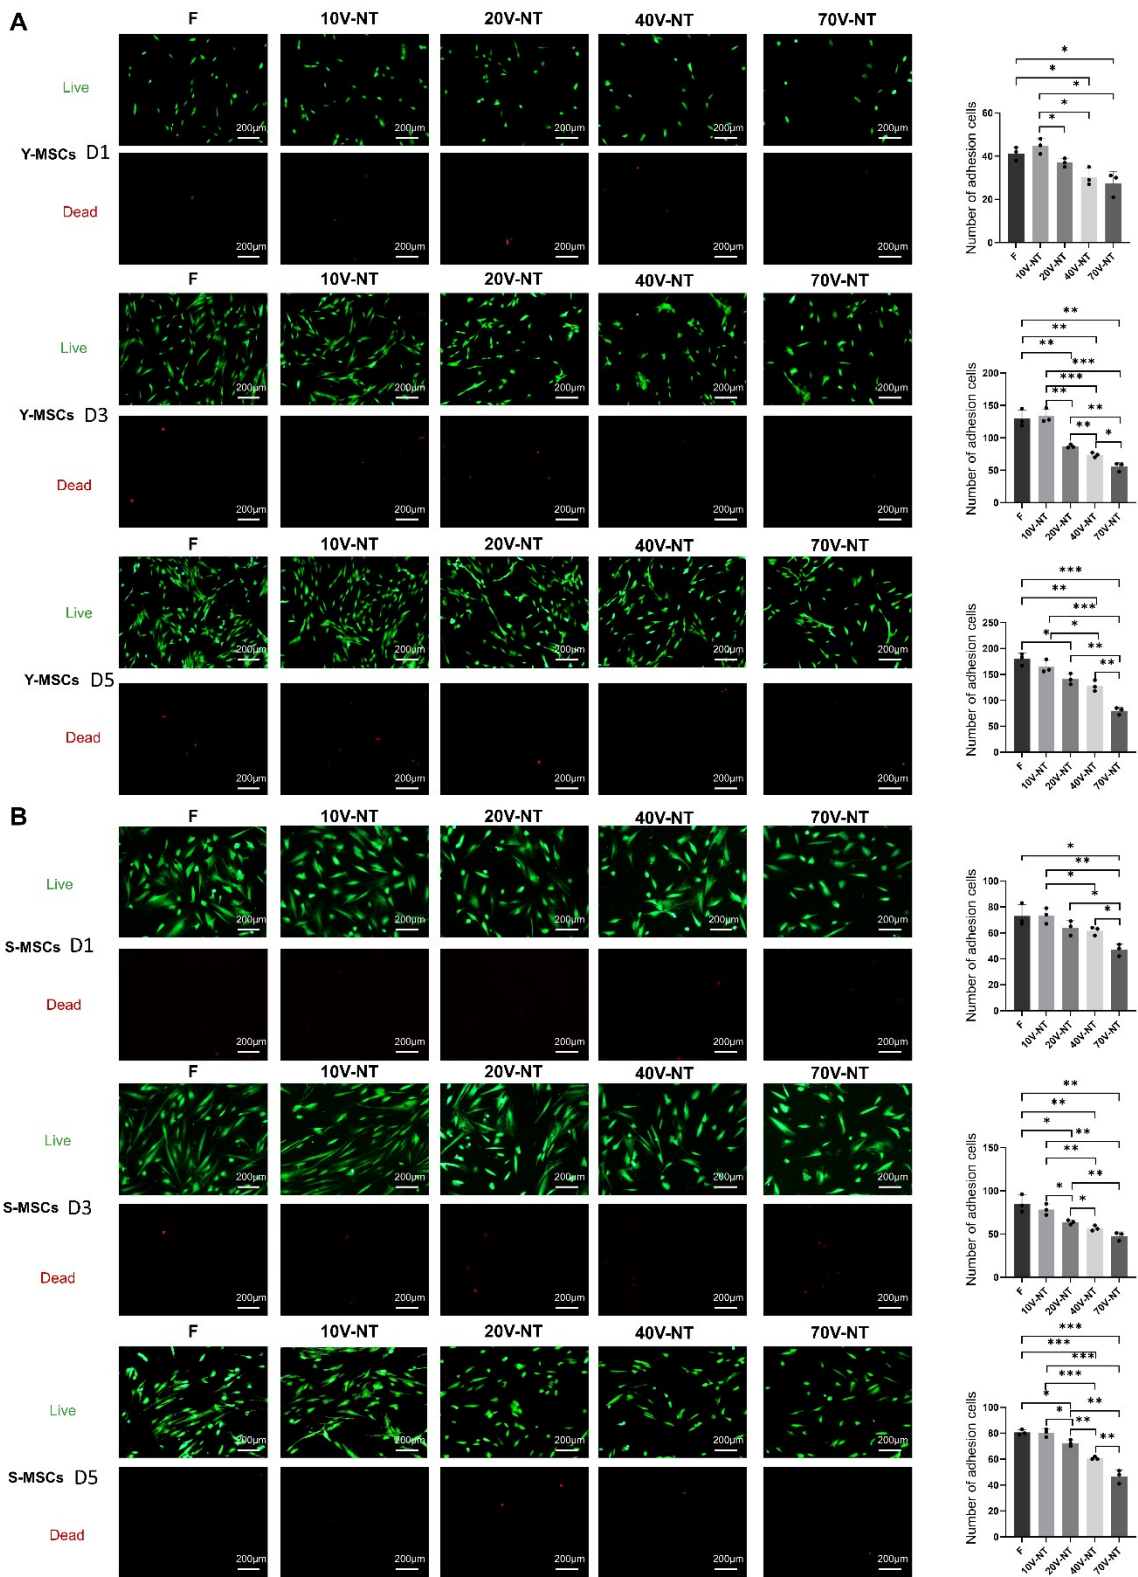

Figure S2. Cell viability and proliferation on nanotube topography. (A) Live/dead staining and quantification of Y-MSCs cultured on different nanotube topographies for 1,3, and 5days. (B) Live/dead staining and quantification of S-MSCs cultured on different nanotube topographies for 1,3, and 5days. (\* $p < 0.05$ , \*\* $p < 0.01$ , \*\*\* $p < 0.001$ , \*\*\*\* $p < 0.0001$ )

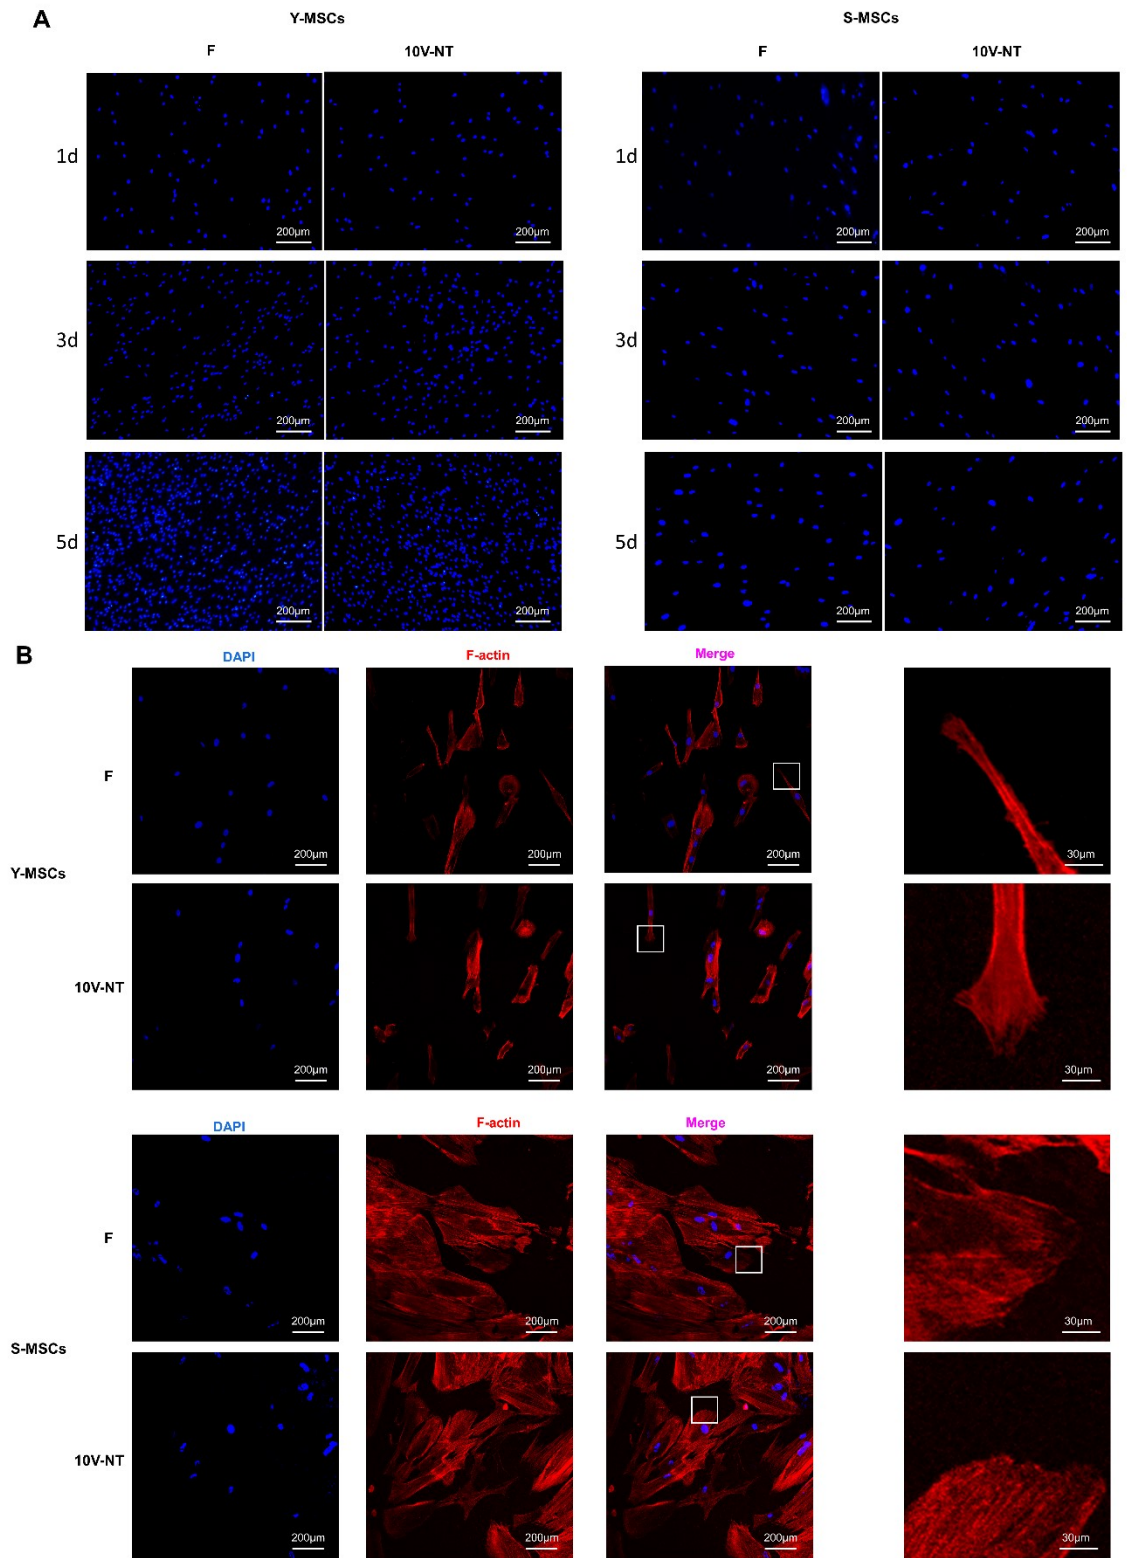

Figure S3. Cell growth and morphology on specialized nanotube topography. (A) Immunostaining of cells on specialized nanotube topography for 1, 3, and 5 days, assessed by DAPI. (B) Immunostaining of morphology of cells cultured on specialized nanotube topography for 2 days, assessed by F-actin immunostaining. The far right is the enlarged image inside the white box.

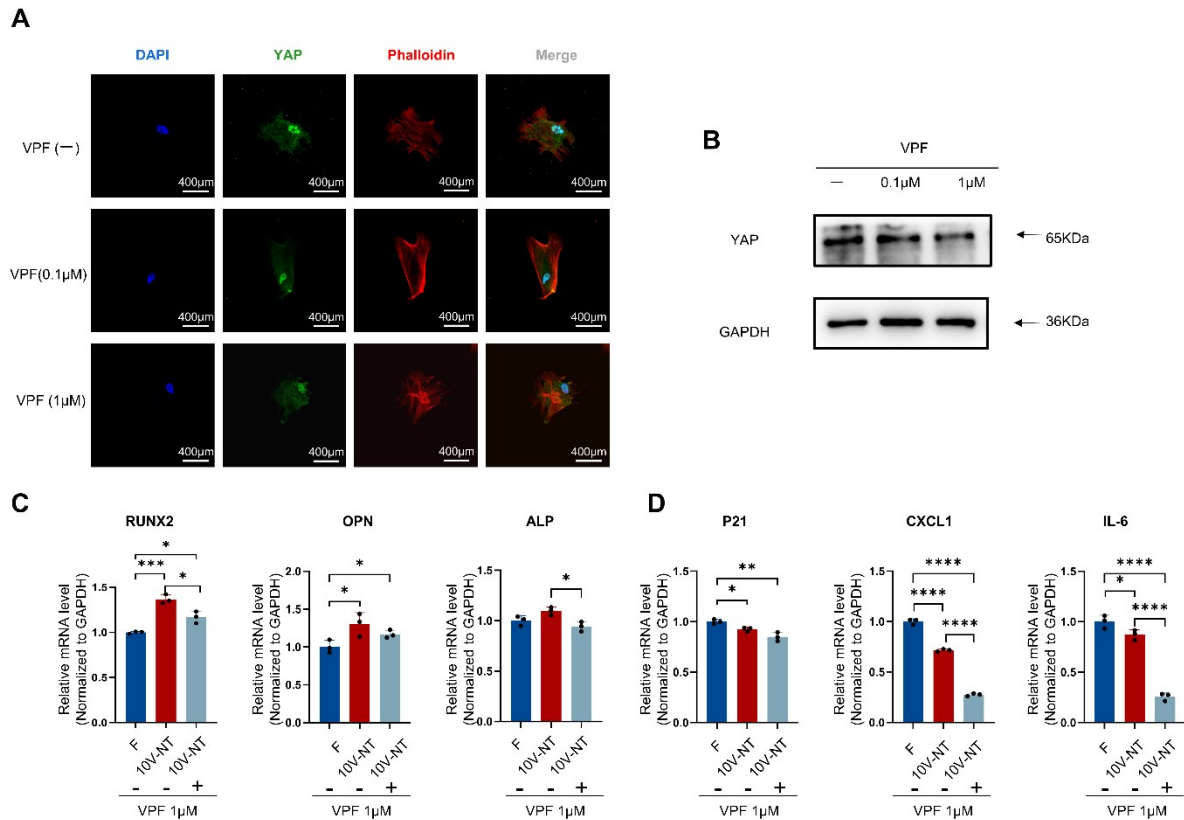

Figure S4. VPF impacts the influence of specialized nanotube topography on S-MSCs. (A) Immunofluorescence staining of YAP in S-MSCs treated with VPF(0.1μM and 1μM) for 2days. (B) Western blot analysis of YAP in S-MSCs treated with VPF (0.1μM and 1μM) for 2days. (C) qRT-PCR analysis of RUNX2, OPN, and ALP in S-MSCs cultured with osteogenic supplements and treated with VPF (1μM) on nanotube topography for 3 days. (D) qRT-PCR analysis of P21, CXCL1, and IL-6 in S-MSCs treated with VPF (1μM) cultured on nanotube topography for 2days. (\*p < 0.05, \*\*p < 0.01, \*\*\*p < 0.001, \*\*\*\*p < 0.0001)

Table S1 Antibodies used for WB and IF

| Antibodies                                                    | Source                    | Identifier | Applications (dilution rate) |
|---------------------------------------------------------------|---------------------------|------------|------------------------------|
| anti-Alkaline Phosphatase, Tissue non-specific antibody (2F4) | abcam                     | ab126820   | WB (1:1000)                  |
| Lamin A/C (4C11)                                              | Cell Signaling Technology | #4777      | IF (1:100)                   |
| p16 INK4A (E6N8P) mAb                                         | Cell Signaling Technology | #18769     | IF (1:100)                   |

|                                                  |                           |            |                         |
|--------------------------------------------------|---------------------------|------------|-------------------------|
| Anti-p21 antibody [EPR3993]                      | abcam                     | ab109199   | WB (1:1000); IF (1:100) |
| Anti-Ki67 antibody                               | abcam                     | ab15580    | IF (1:100)              |
| YAP(D8H1X)                                       | Cell Signaling Technology | #14074     | WB (1:1000); IF (1:100) |
| FAK rabbit pAb                                   | Zen                       | 343861     | WB (1:1000)             |
| p-FAK                                            | Zen                       | 381143     | WB (1:1000)             |
| GAPDH                                            | Zen                       | 200306-7E4 | WB (1:2000)             |
| anti-acetylated alpha tubulin antibody [6-11B-1] | abcam                     | ab24610    | WB (1:1000)             |
| Alexa Fluor 488 Goat anti Mouse                  | invitrogen                | A11001     | IF (1:200)              |
| Alexa Fluor 488 Goat anti Rabbit                 | invitrogen                | A11008     | IF (1:200)              |
| DAPI solution,1mg/ml                             | Solarbio                  | C0060      | IF (1:1000)             |
| Alexa Fluor 555 Phalloidin                       | Cell Signaling Technology | #8953      | IF (1:200)              |
| Goat Anti-Mouse IgG H&L (HRP)                    | Zen                       | 511103     | WB (1:2000)             |
| Goat Anti-Rabbit IgG H&L (HRP)                   | Zen                       | 511203     | WB (1:2000)             |

**Table S2 Primer sequences used for qRT-PCR analysis of gene expression**

| Gene | Forward primer            | Reverse primer             |
|------|---------------------------|----------------------------|
| P16  | GCTTCCTGGACACGCTGGT       | CATCTATGCGGGCATGGTTA       |
| P21  | GGGAGCAGGCTGAAGGGT        | CGGCGTTTGGAGTGGTAGAA       |
| P53  | GCTTTGAGGTGCGTGTGTTGTG    | TTGGGCAGTGCTCGCTTAG        |
| MMP3 | TGAGGACACCAGCATGAACC      | ACTTCGGGATGCCAGGAAAG       |
| Ki67 | TCCTTTGGTGGGCACCTAAGACCTG | TGATGGTTGAGGTCGTTCCCTTGATG |
| BMP2 | ACCCGCTGTCTTCTAGCGT       | TTTCAGGCCGAACATGCTGAG      |

|               |                        |                         |
|---------------|------------------------|-------------------------|
| RUNX2         | TGGTACTGTCATGGCGGGTA   | TCTCAGATCGTTGAACCTTGCTA |
| OPN           | GAAGTTTCGCAGACCTGACAT  | GTATGCACCATTCAACTCCTCG  |
| OCN           | CACTCCTCGCCCTATTGGC    | CCCTCCTGCTTGGACACAAAG   |
| ALP           | ACTGGTACTCAGACAACGAGAT | ACGTCAATGTCCCTGATGTTATG |
| CXCL1         | GCAGCAGGAGCGTCCGTGGC   | CGGTTTGGGCGCAGTGGGGT    |
| TNF- $\alpha$ | CCCAGGGACCTCTCTAATCA   | GCTTGAGGGTTTGCTACAACATG |
| IL-6          | TGTGAAAGCAGCAAAGAGGC   | TGGGTCAGGGGTGGTTATT     |
| MMP1          | TGTTCTGGGGTGTGGTGTCT   | CACACGCTTTTGGGGTTTGT    |
| TGF- $\beta$  | CTGTACATTGACTTCCGCAAG  | TGTCCAGGCTCCAAATGTAG    |
| ANKRD1        | AGTAGAGGAACTGGTCACTGG  | TGTTTCTCGCTTTTCCACTGTT  |
| AXL           | CCGTGGACCTACTCTGGCT    | CCTTGGCGTTATGGGCTTC     |
| GAPDH         | CTTTGGTATCGTGGAAGGACTC | GTAGAGGCAGGGATGATGTTCT  |

**Table S3 Compounds used in this study**

| Compounds   | Source  | Identifier | Concentration          |
|-------------|---------|------------|------------------------|
| RO3306      | Selleck | S7747      | 9 $\mu$ M              |
| Nutlin3a    | Selleck | S8059      | 5 $\mu$ M              |
| BI-2536     | Selleck | S1109      | 100 nM                 |
| Verteporfin | Selleck | S1786      | 0.1 $\mu$ M, 1 $\mu$ M |
